# Supplementary material
Source: PubMed Central journal article supplement (PMC4185158)

# Copper-Catalyzed Decarboxylative Trifluoromethylation of Propargyl Bromodifluoroacetates

*Brett R. Ambler, Santosh Peddi, Ryan A. Altman*

Department of Medicinal Chemistry

Lawrence, KS 66045

raaltman@ku.edu

## **Supporting Information**

NMR Data

S2–S18

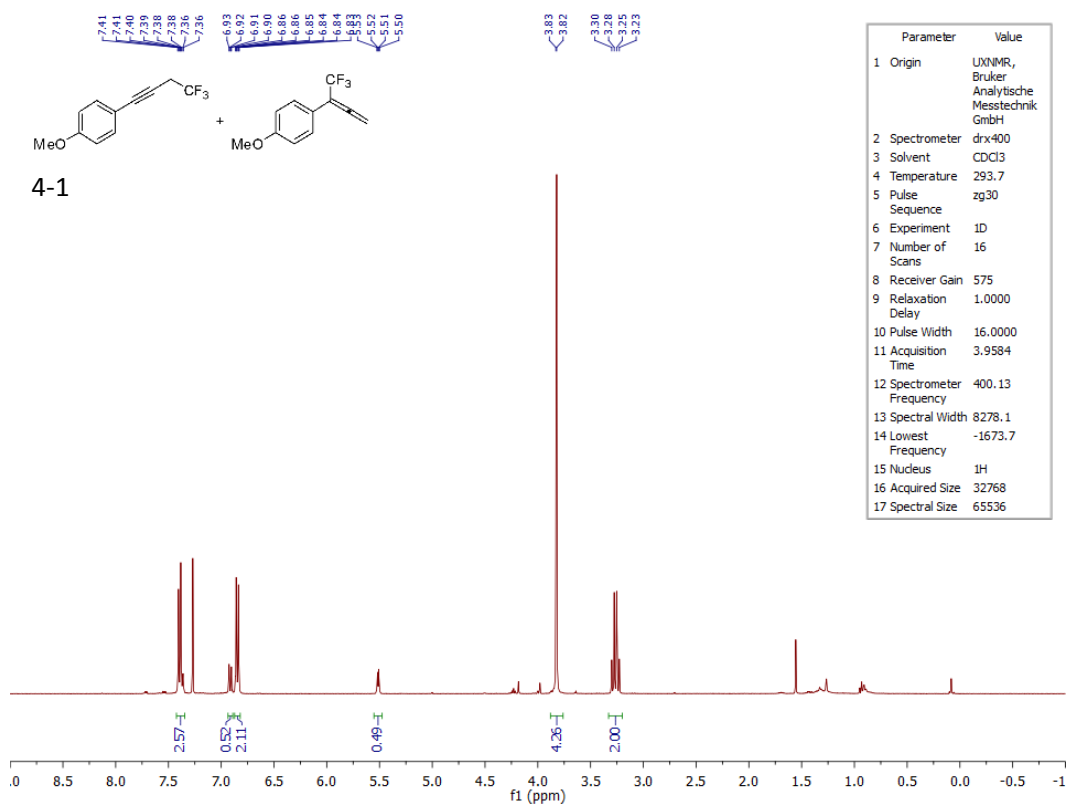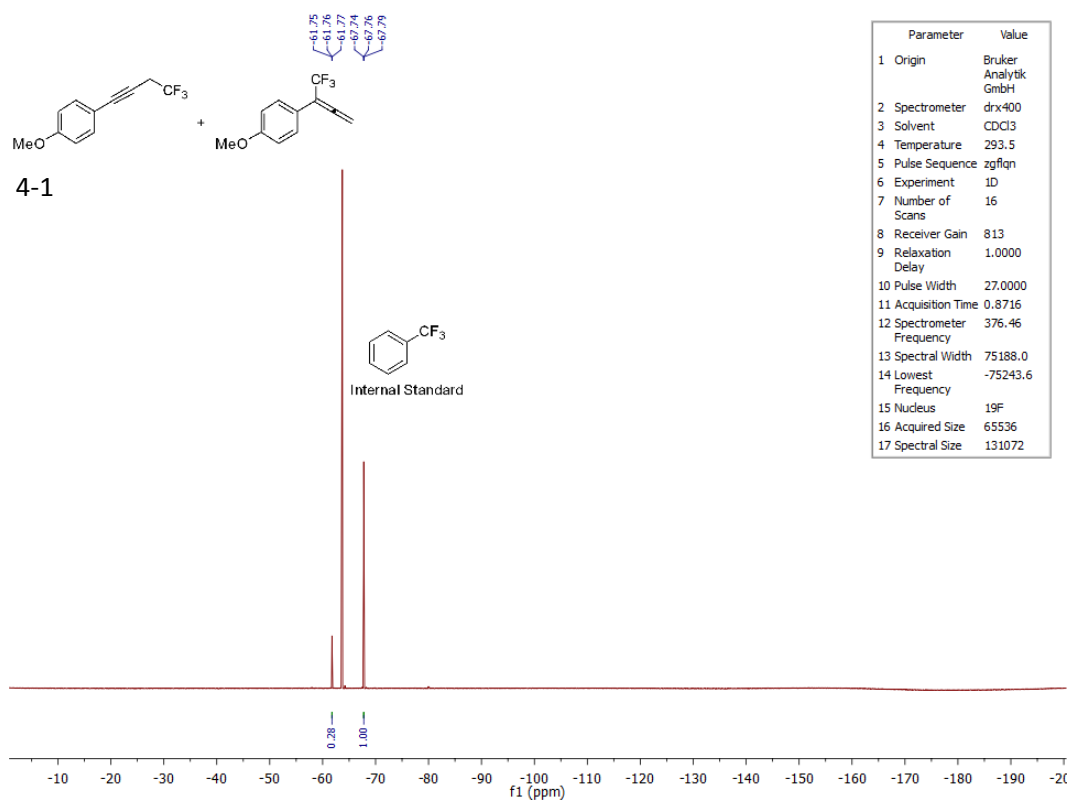

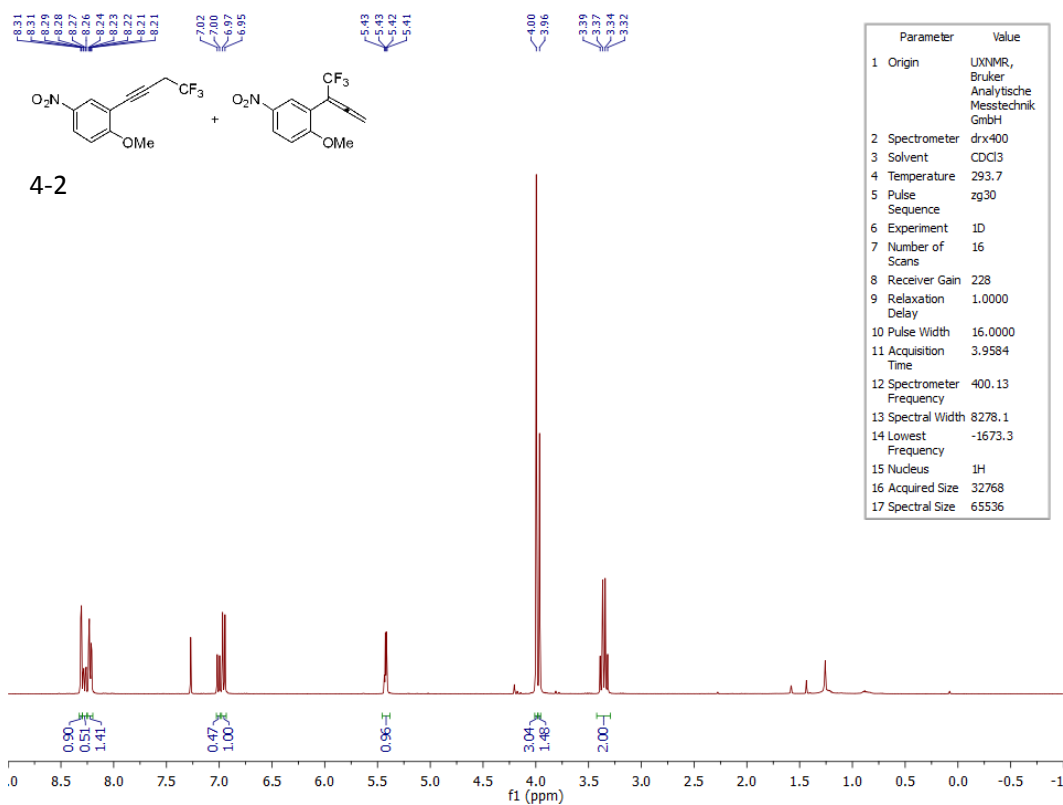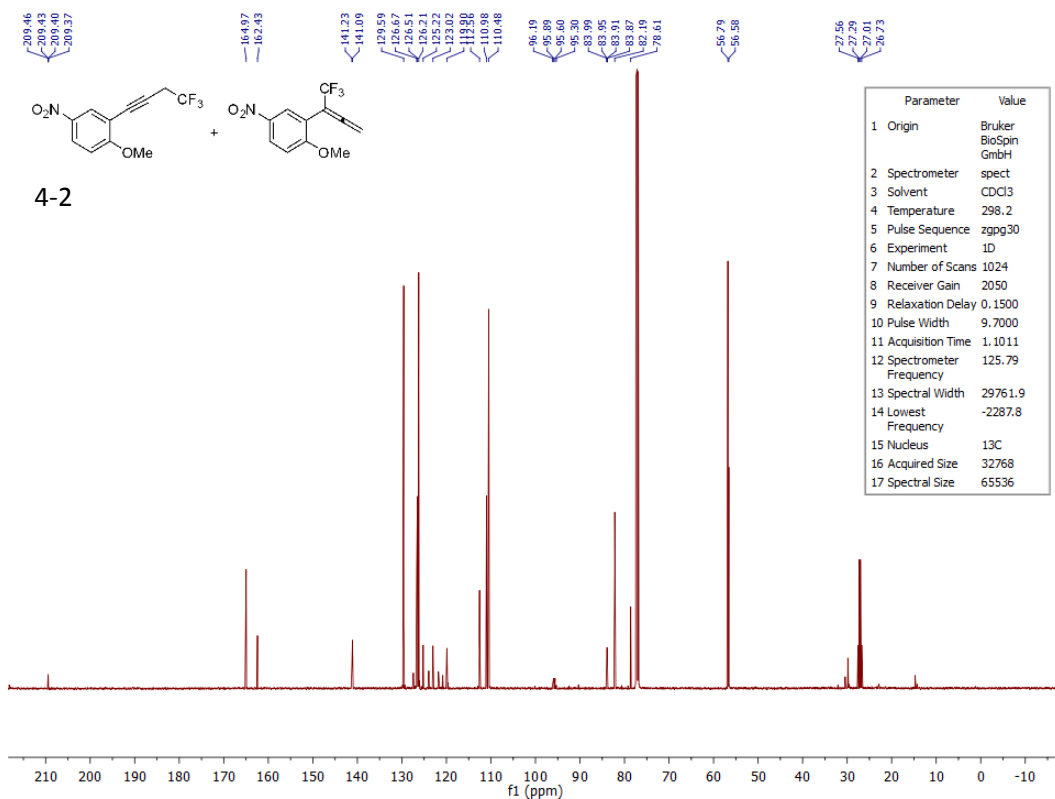

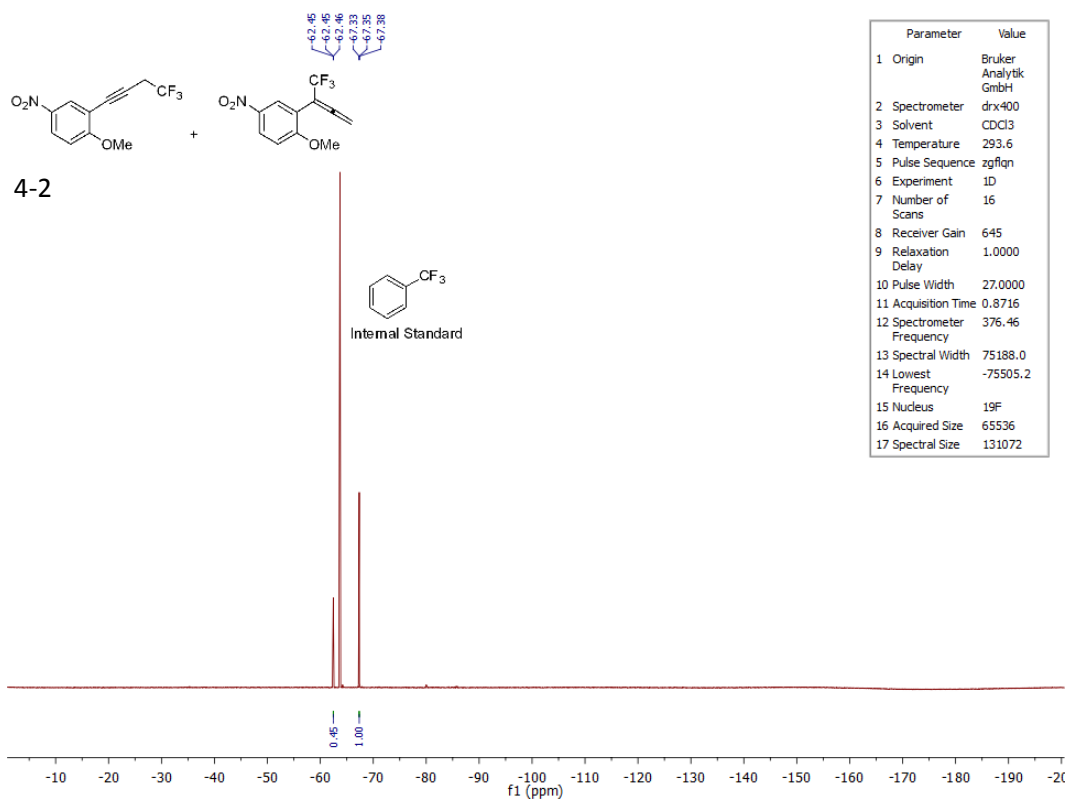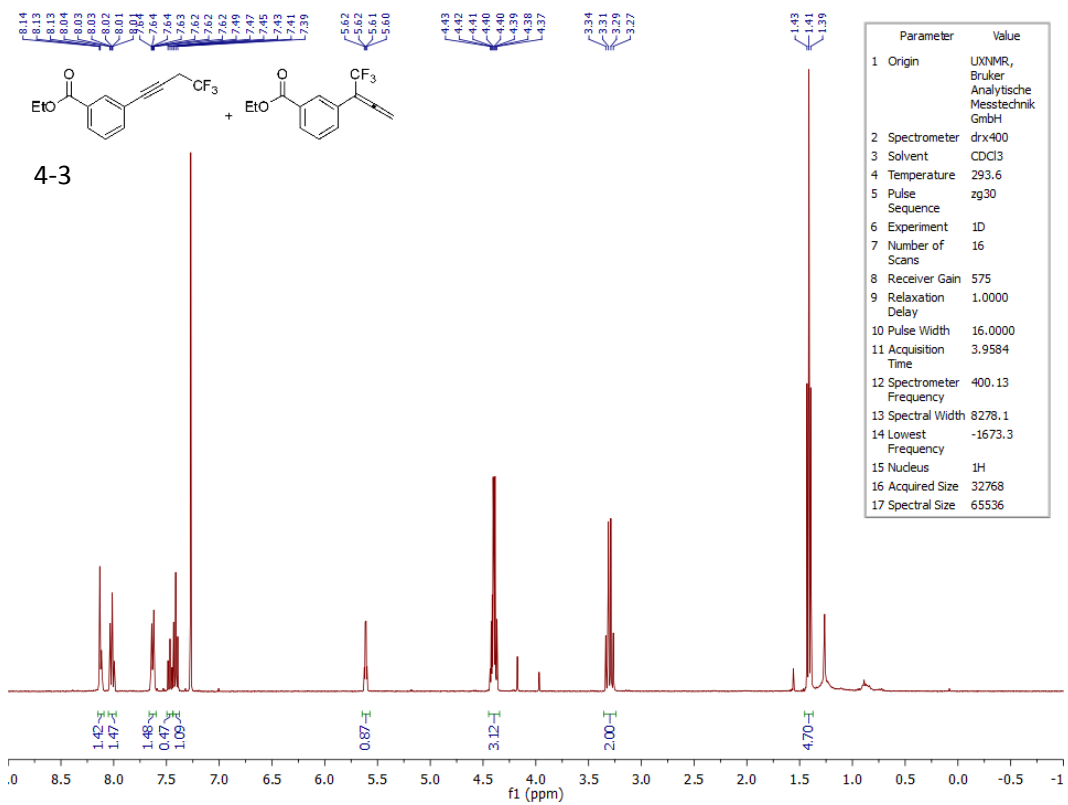

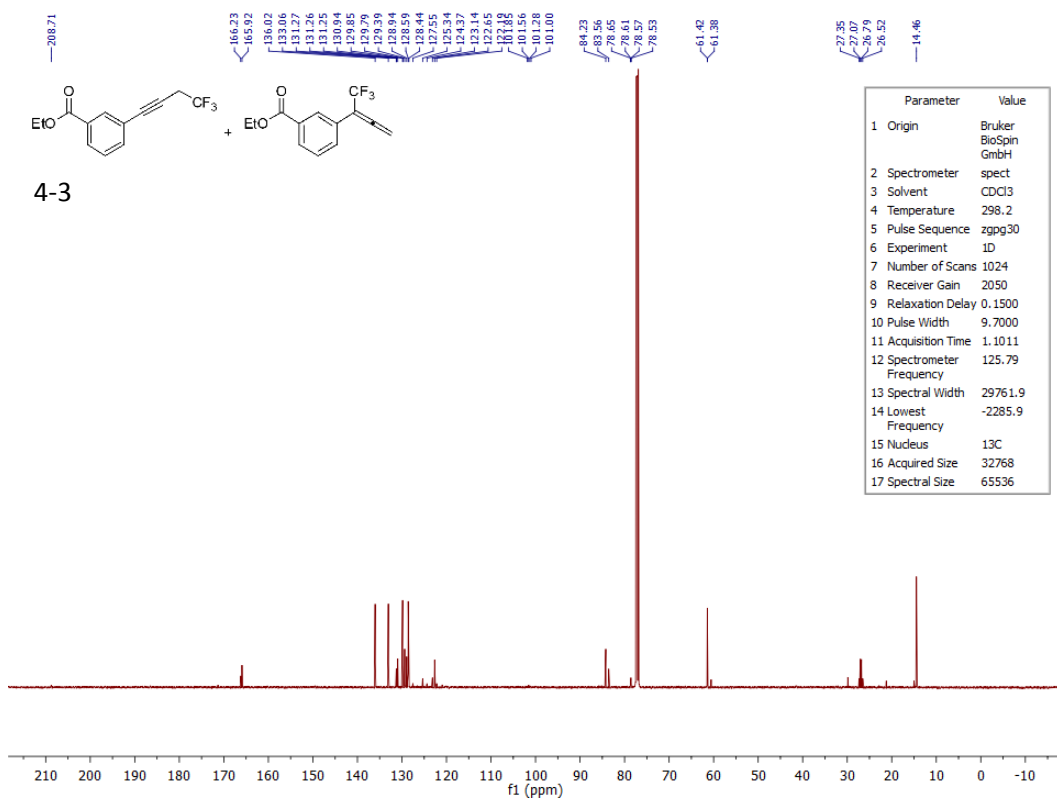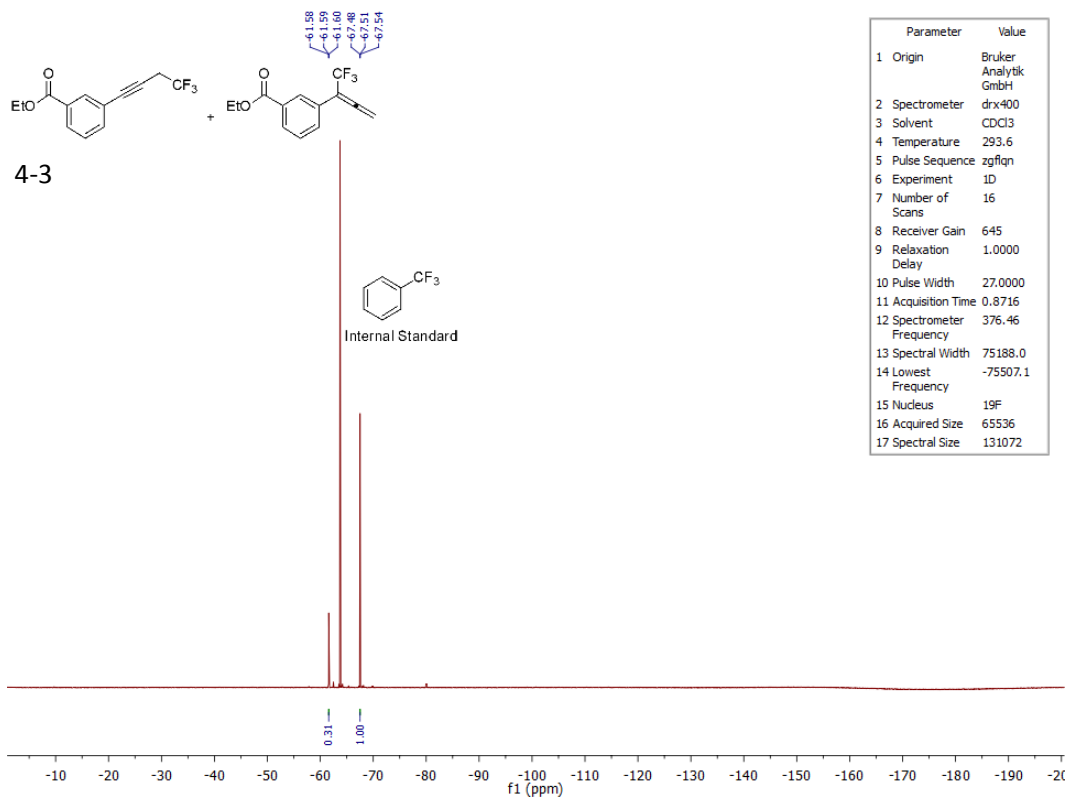

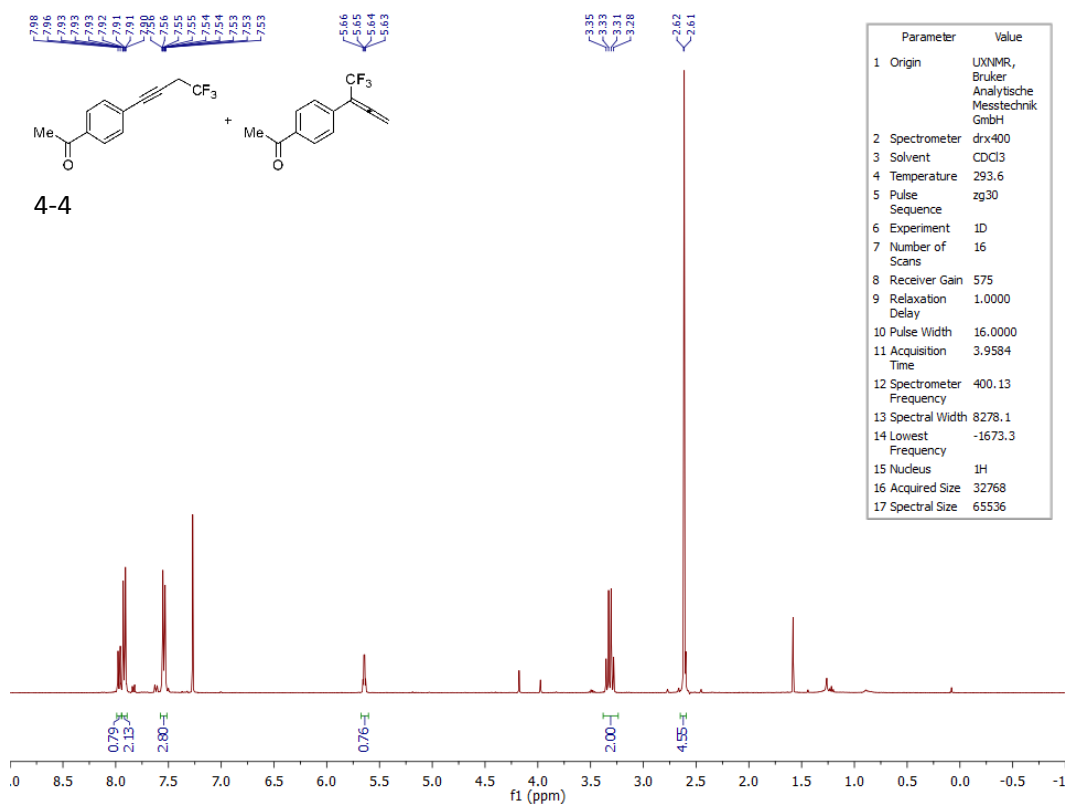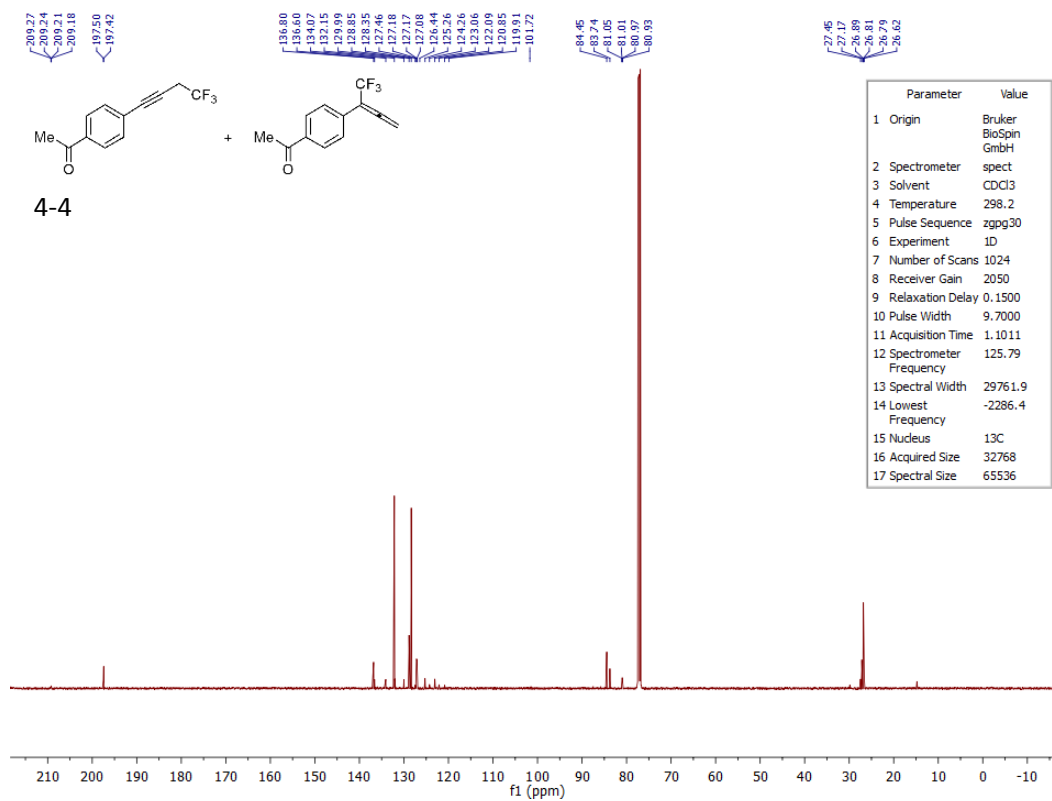

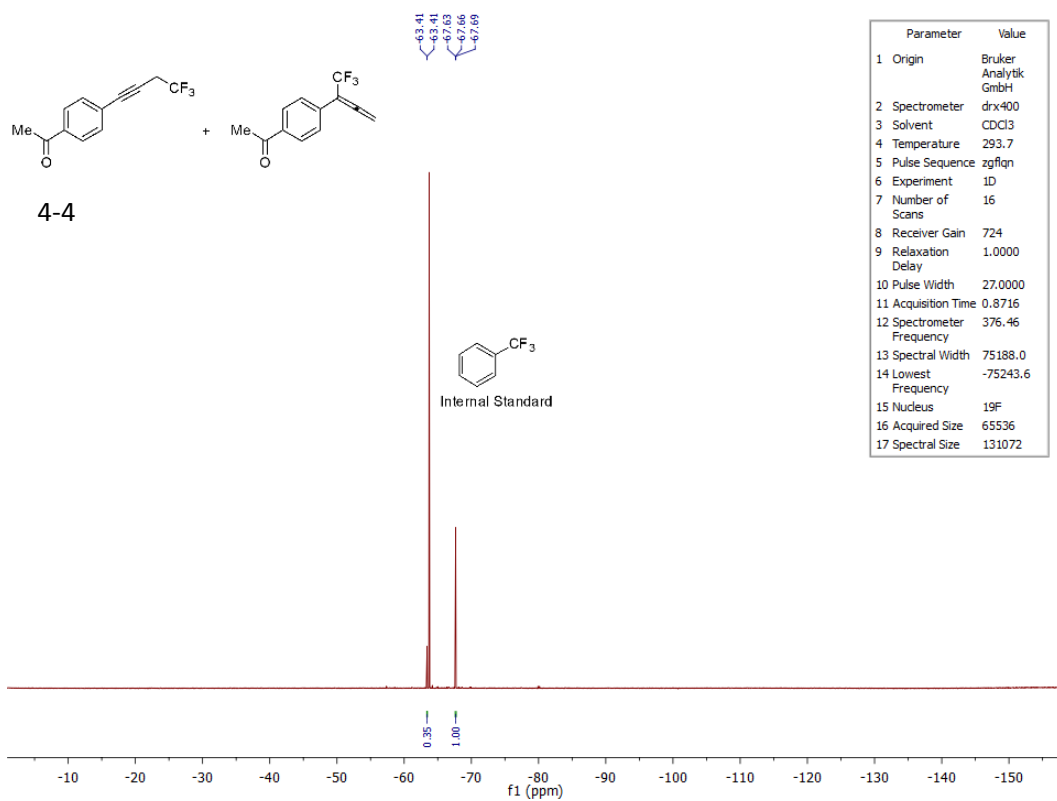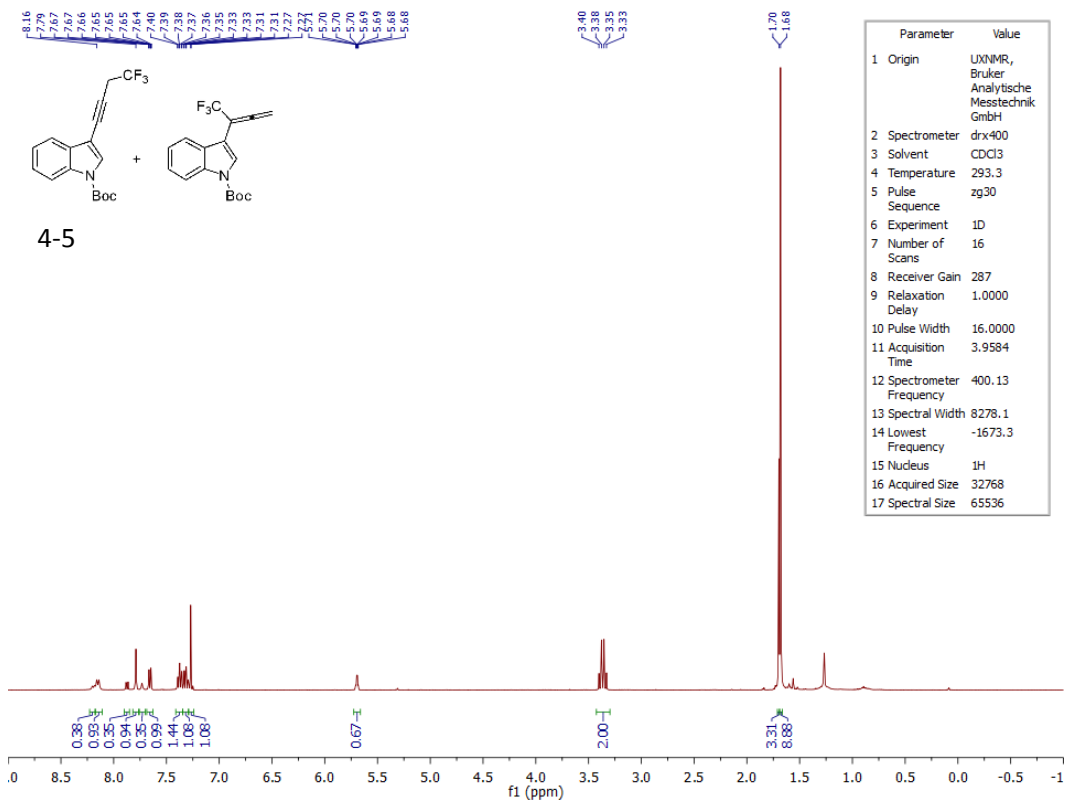

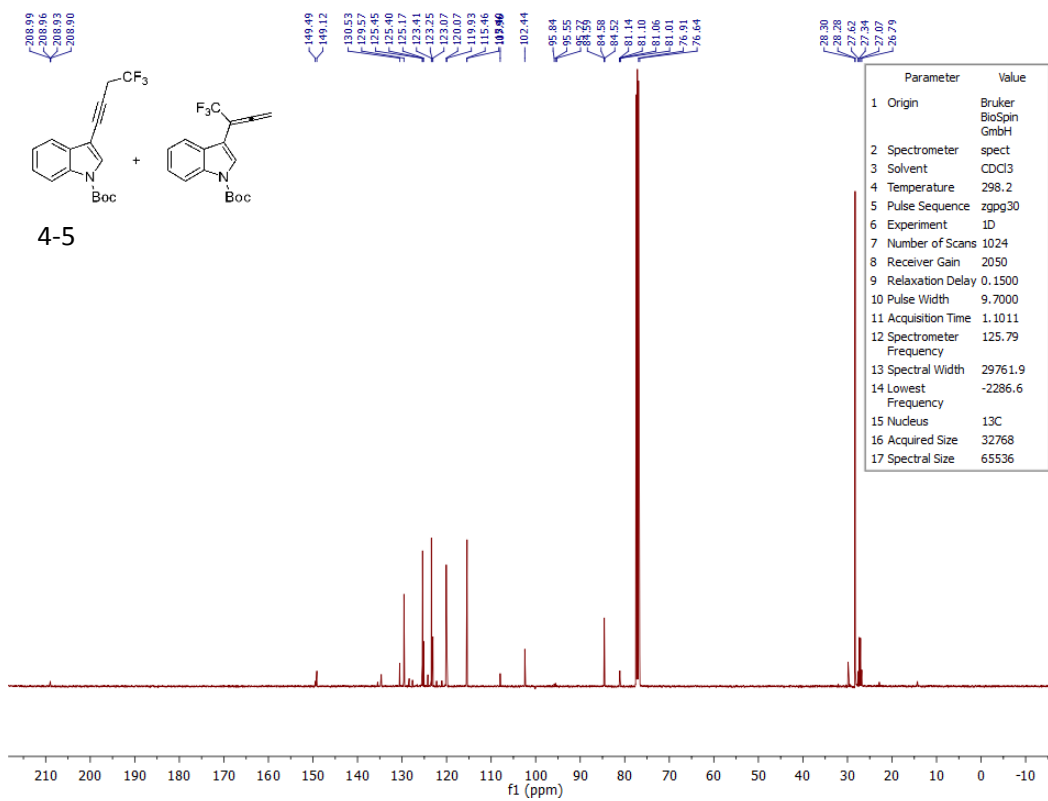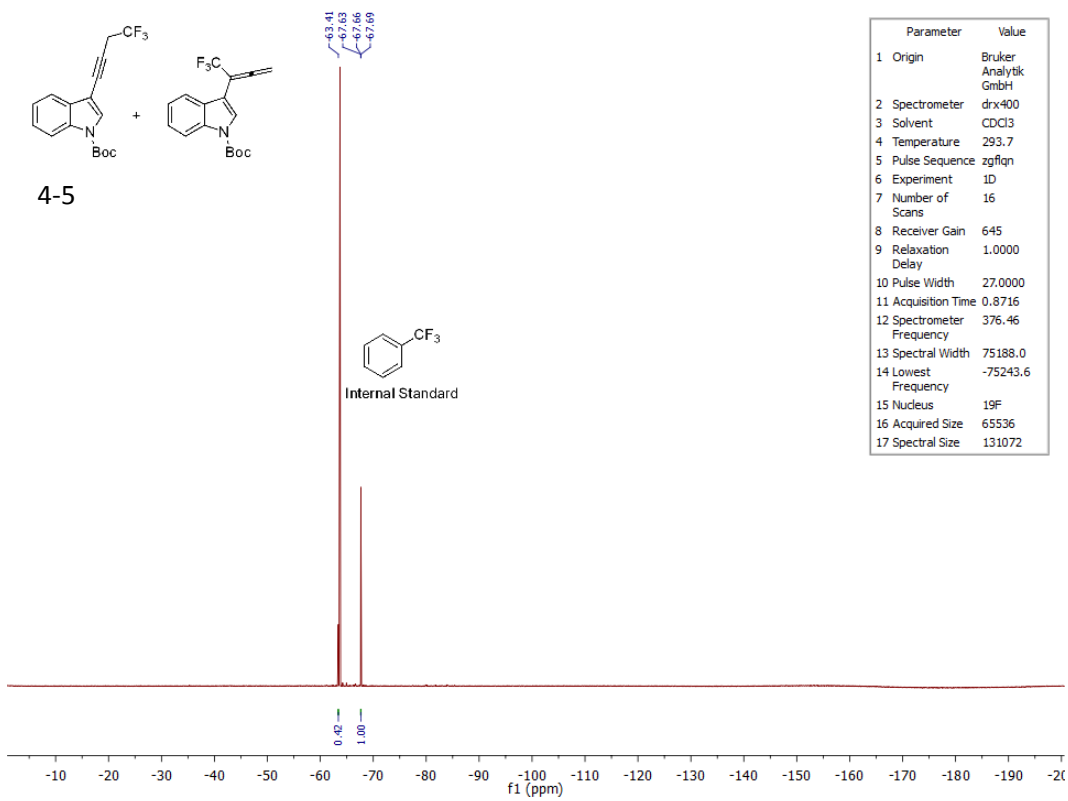



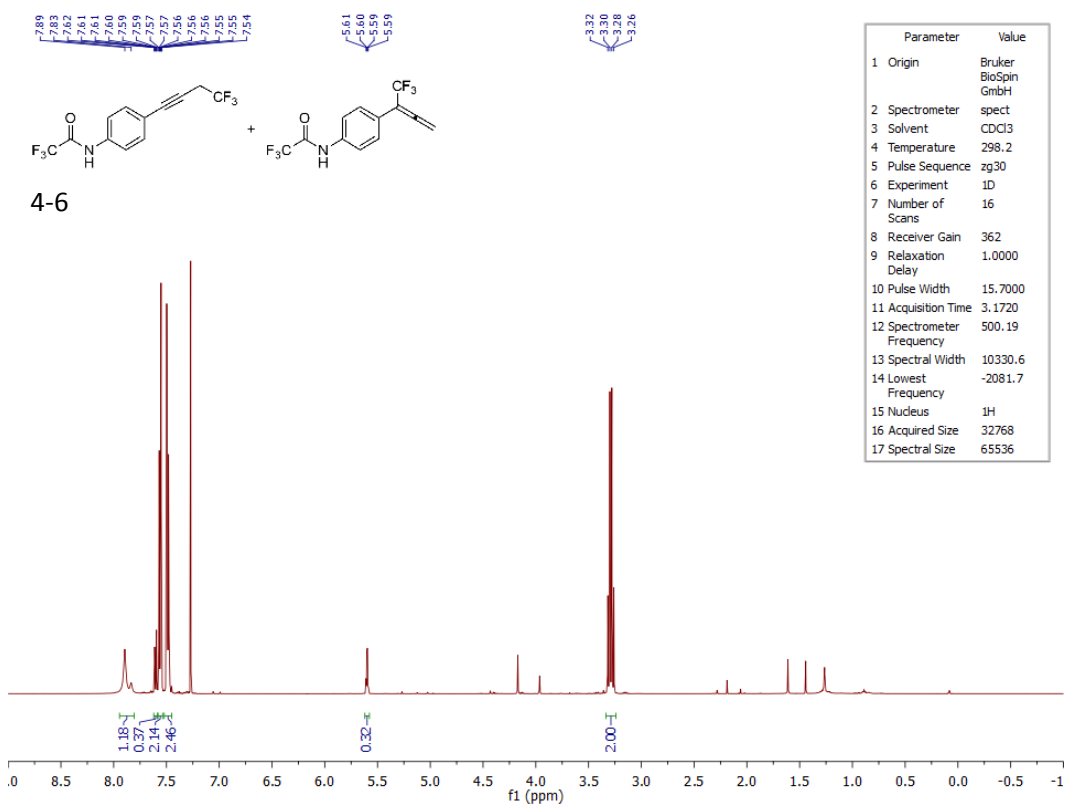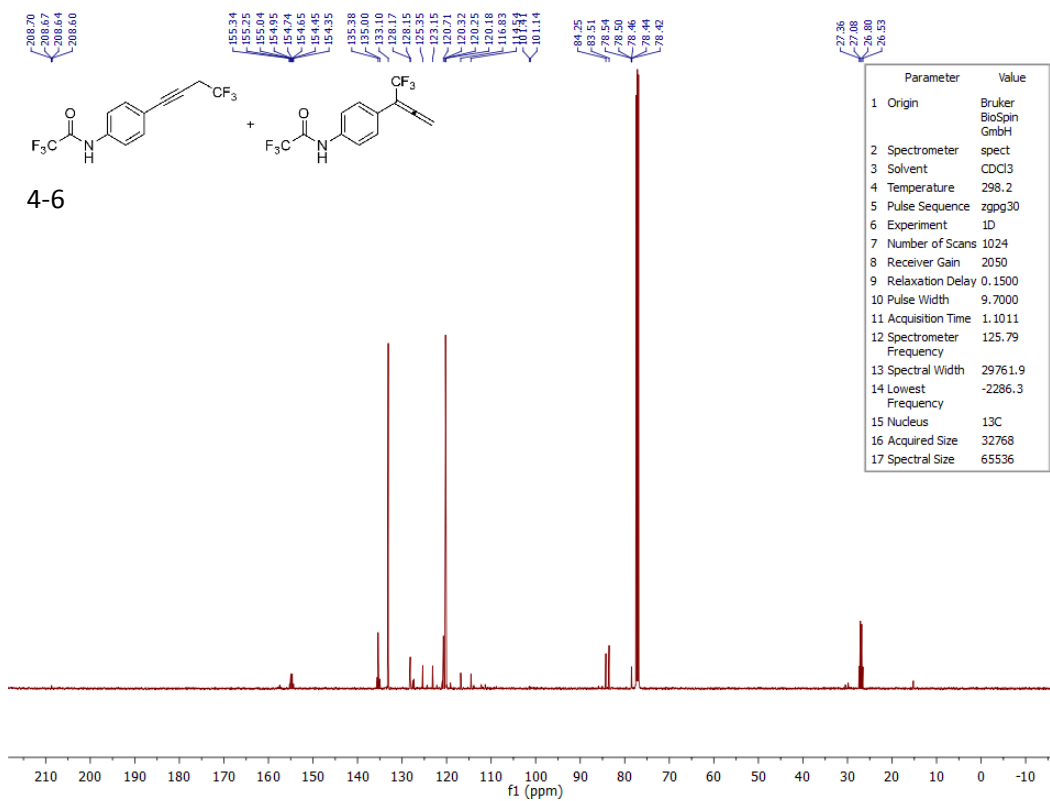

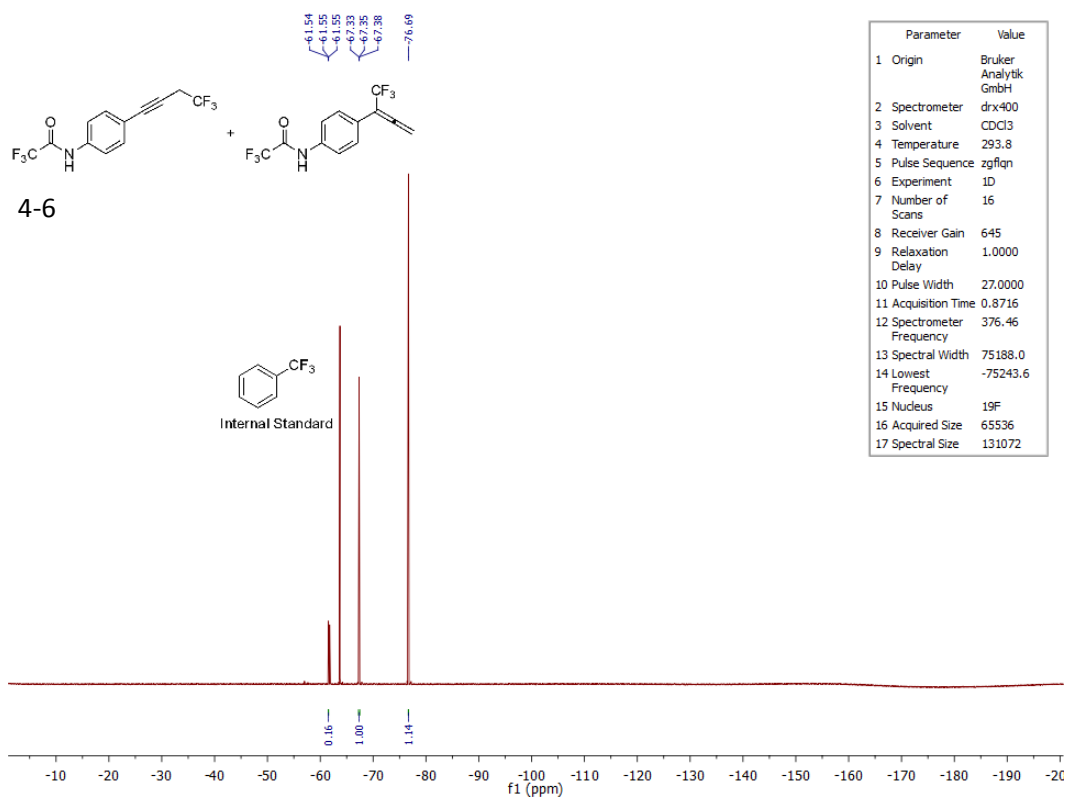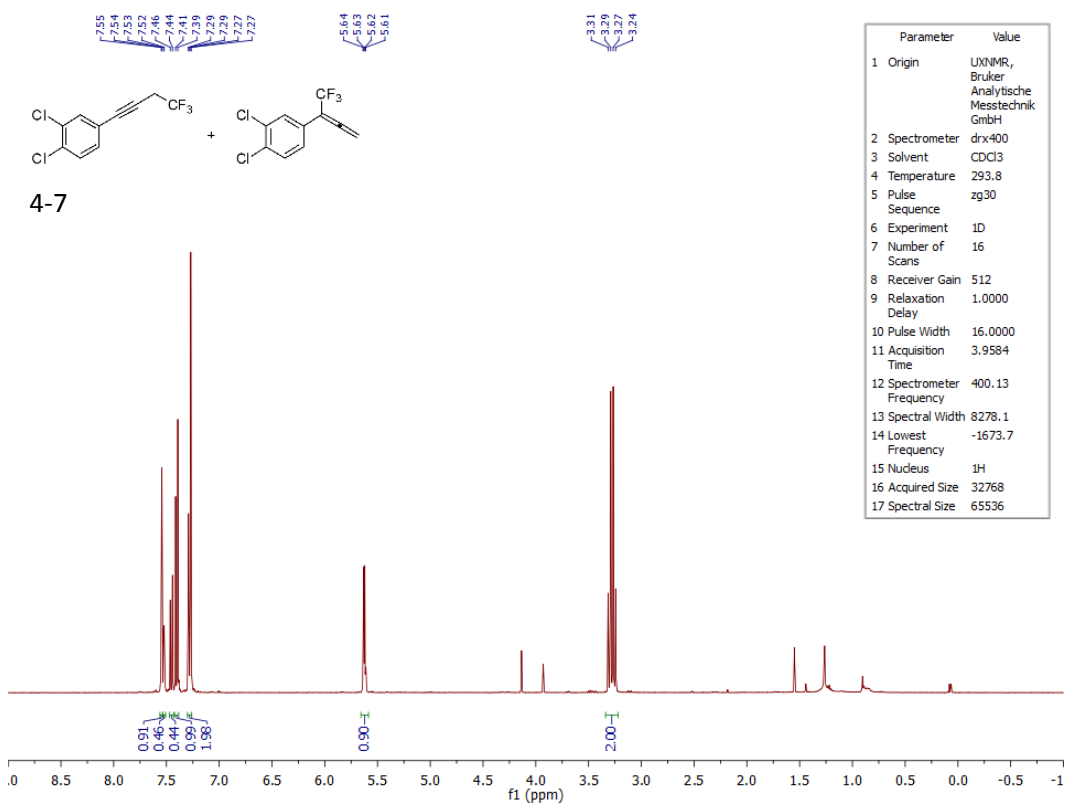

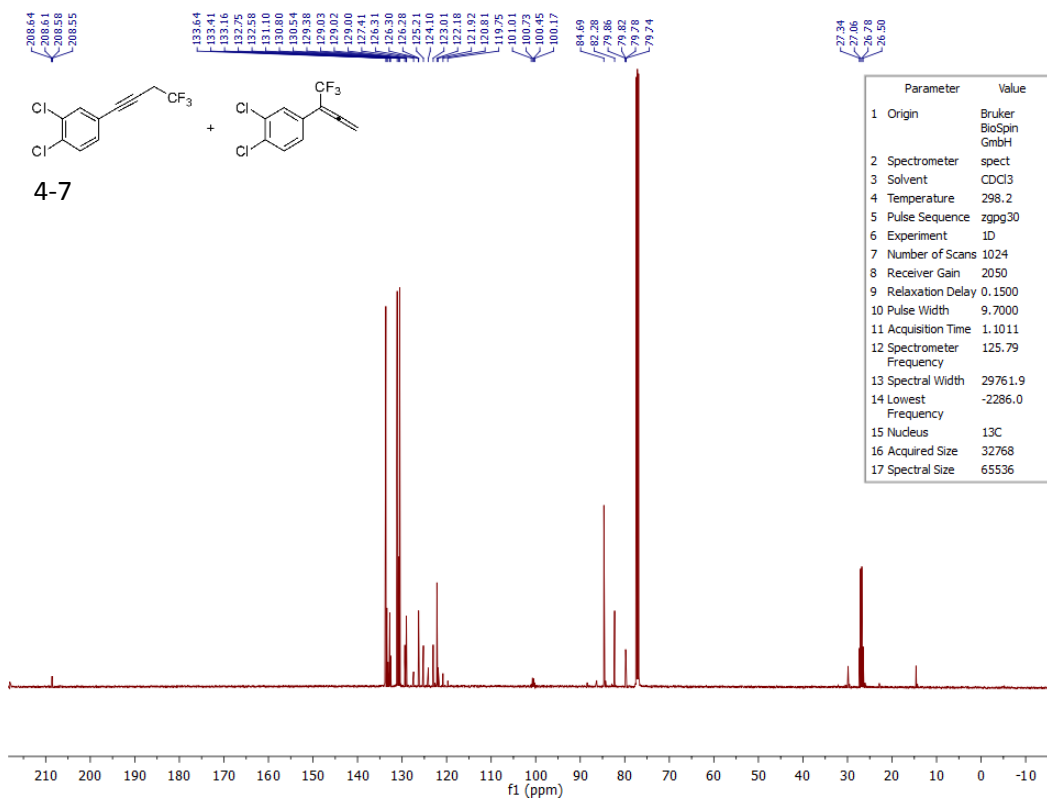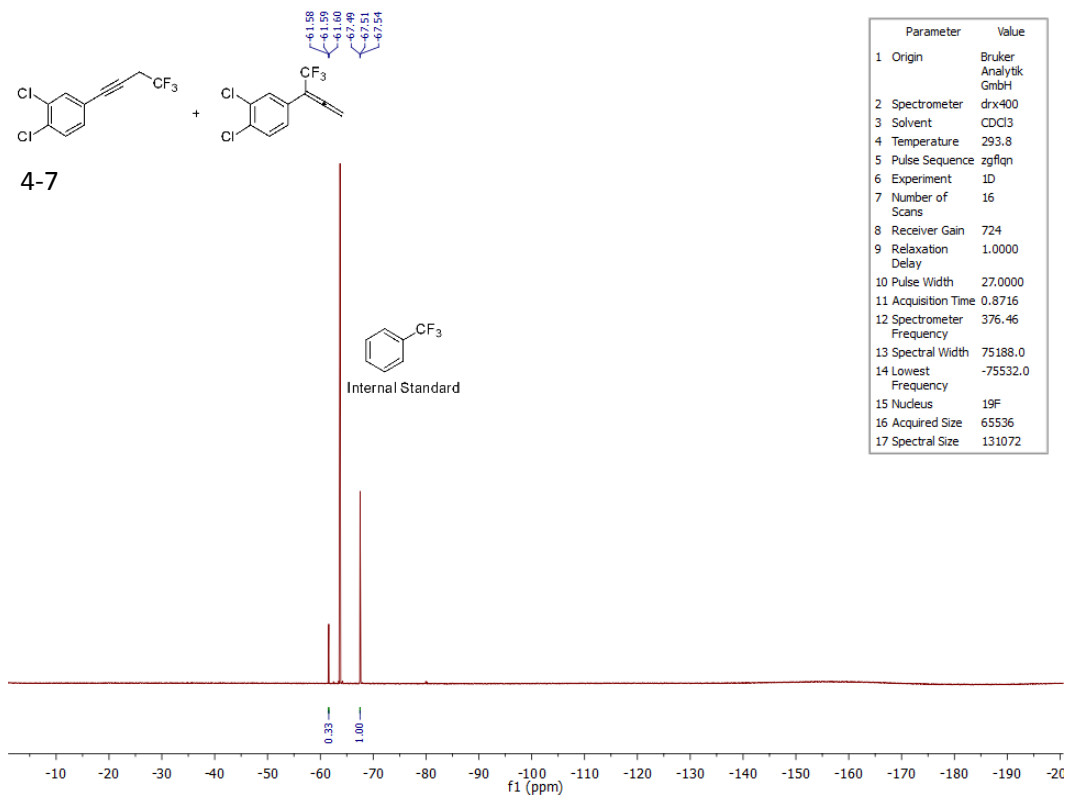

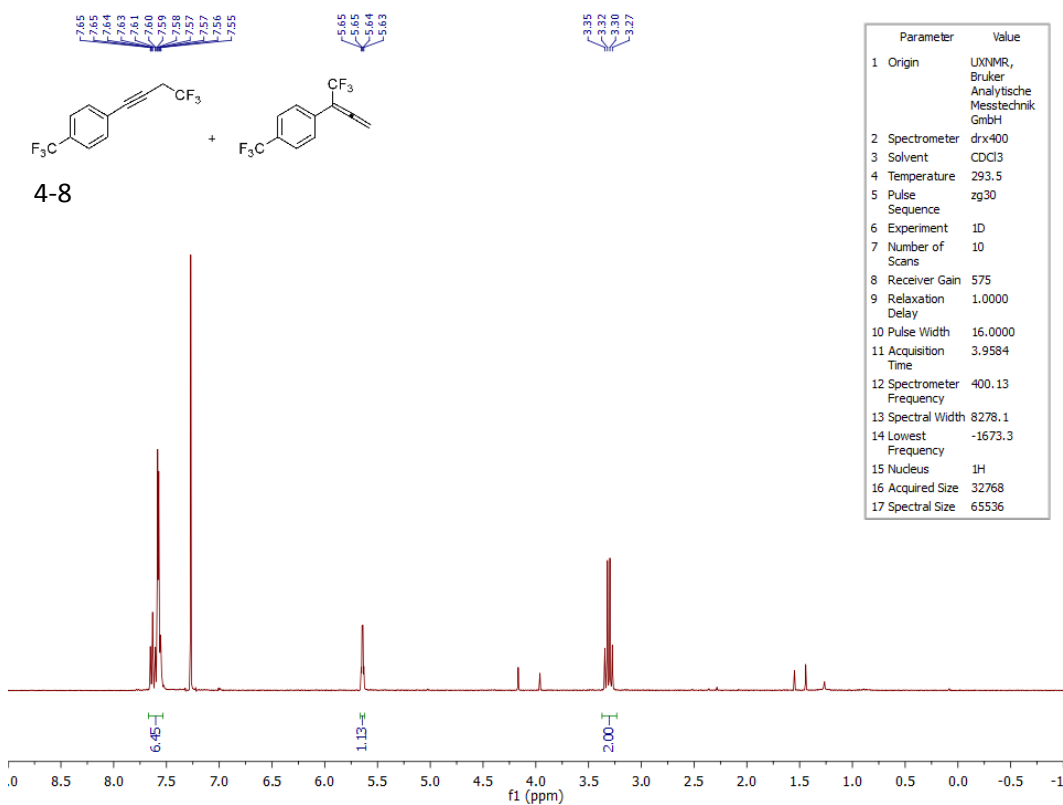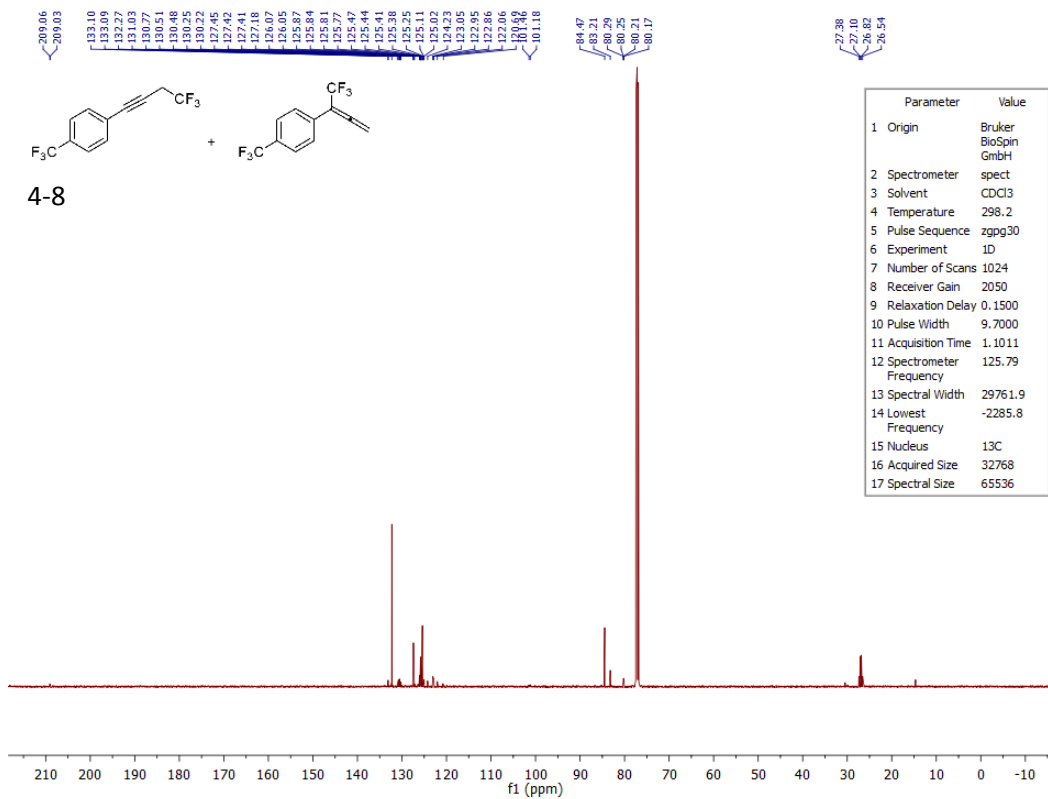

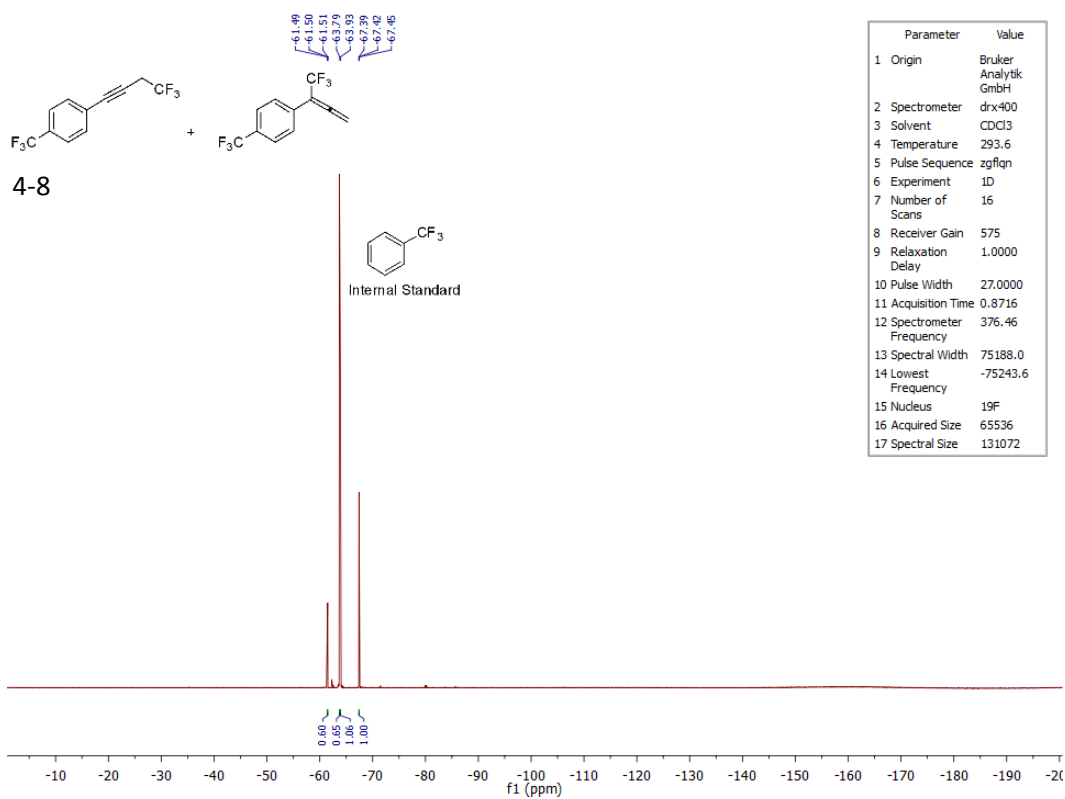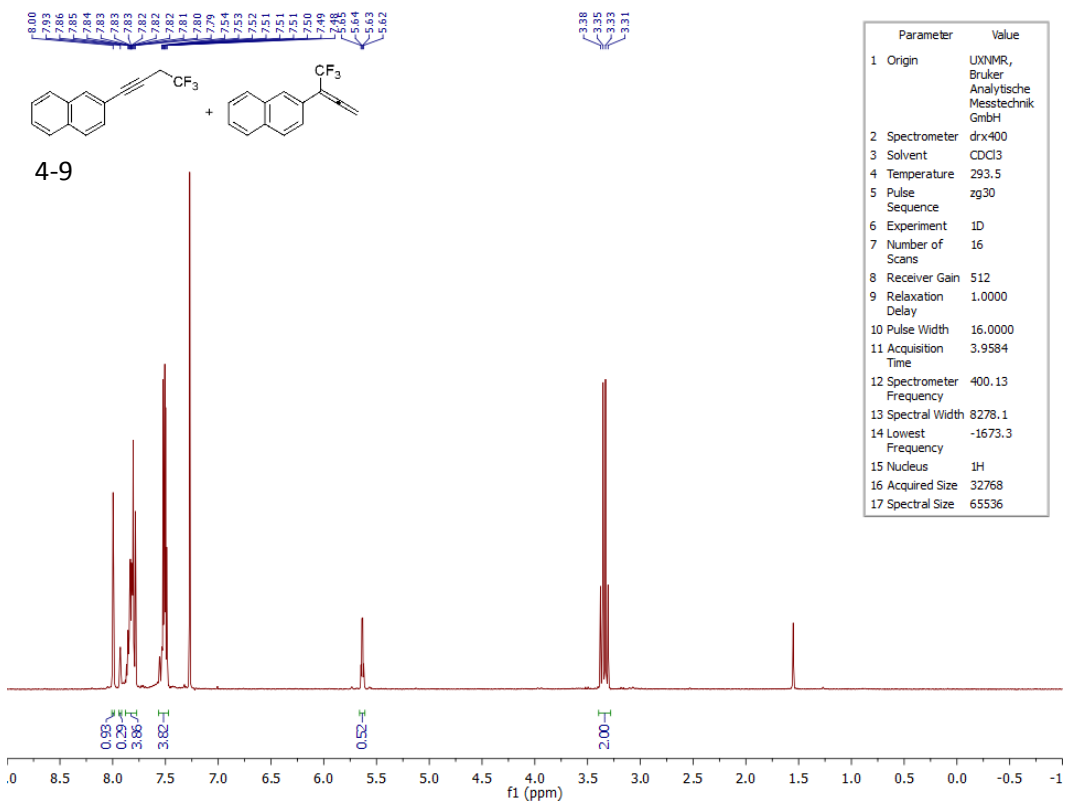

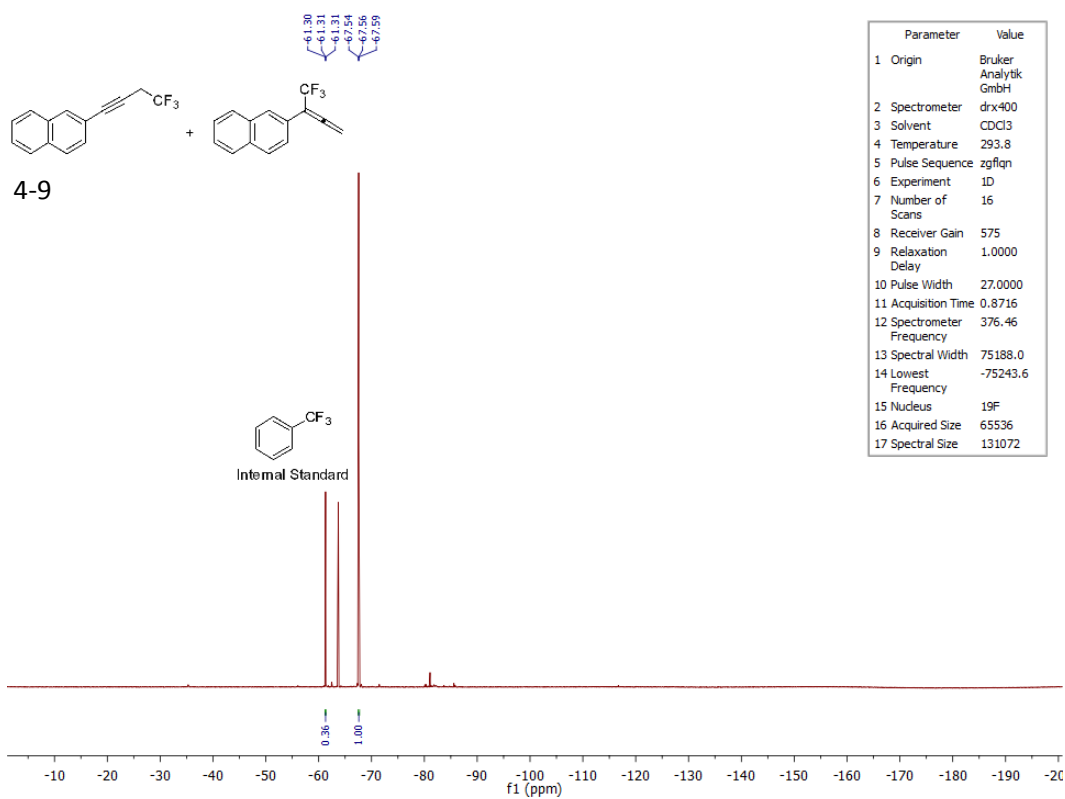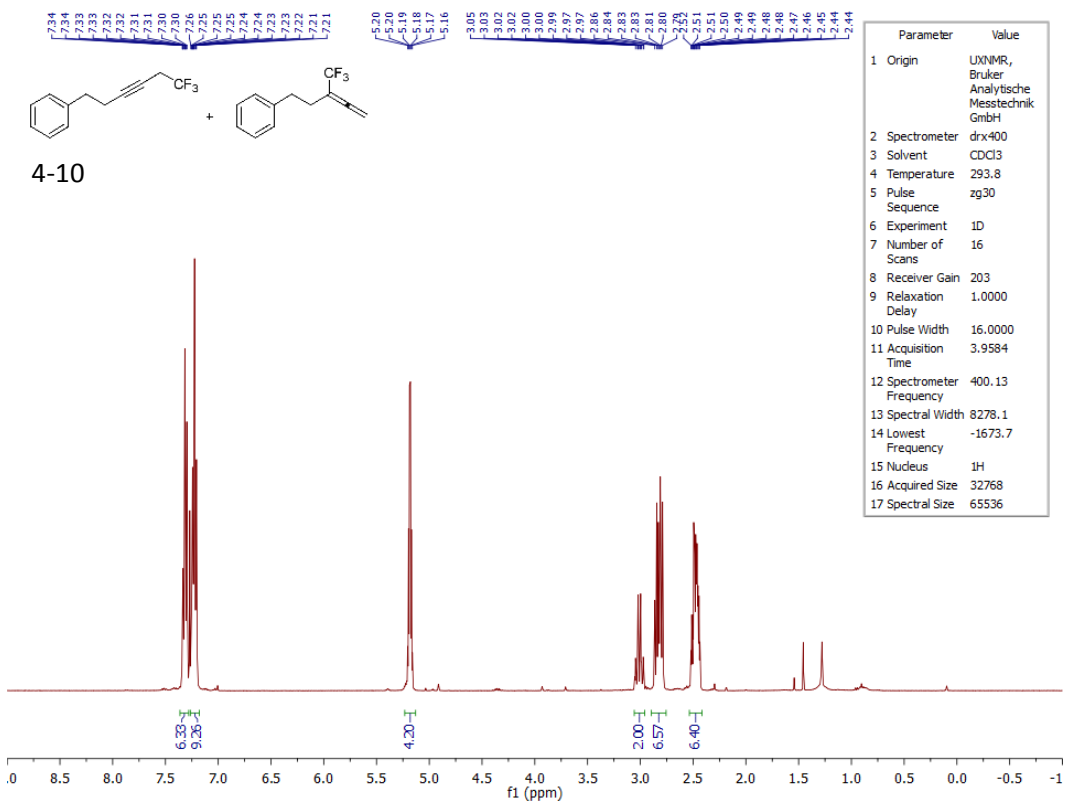

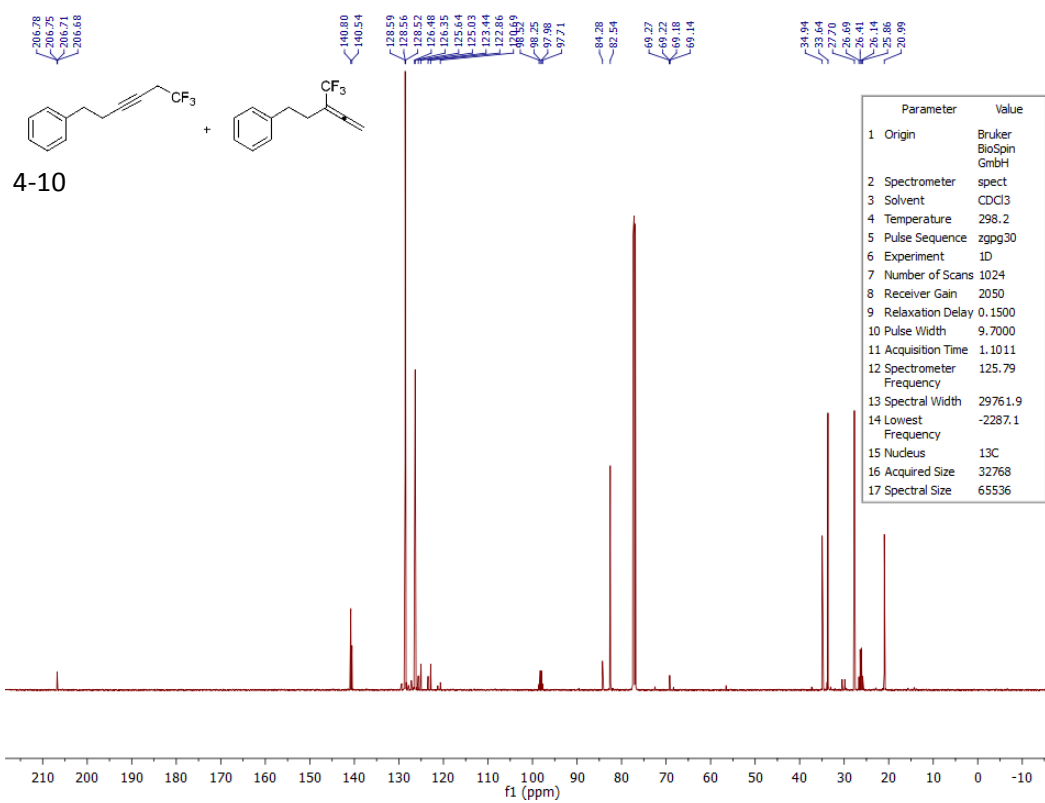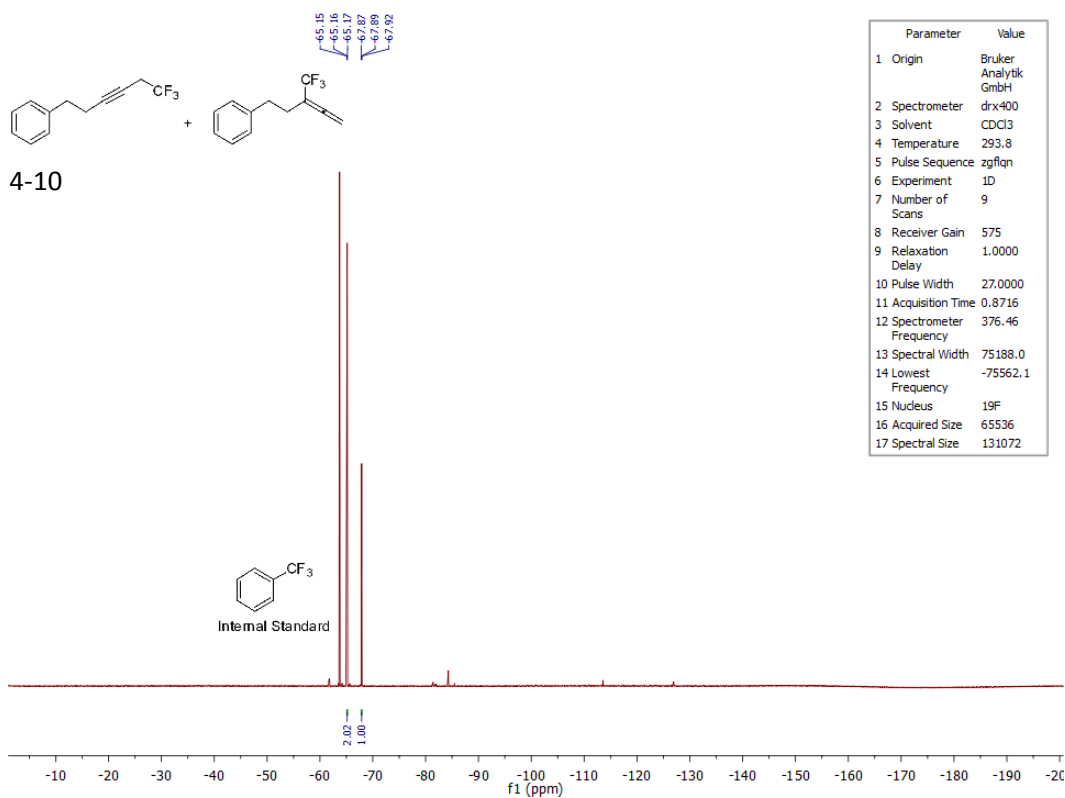

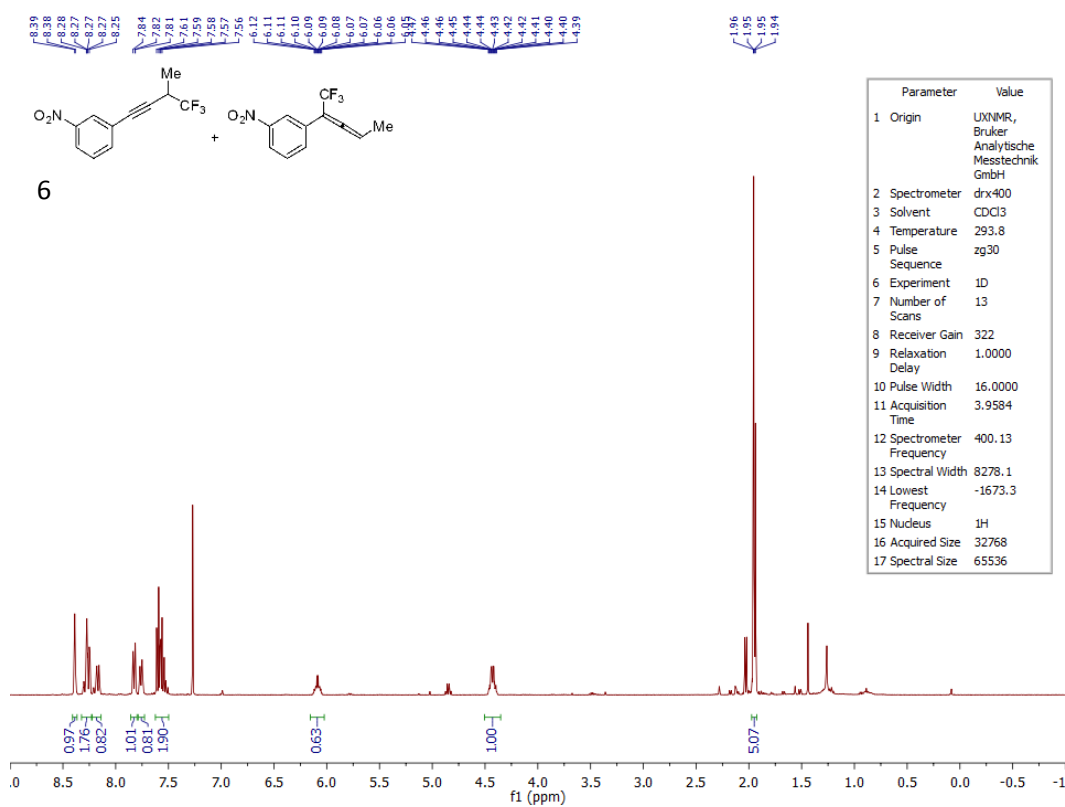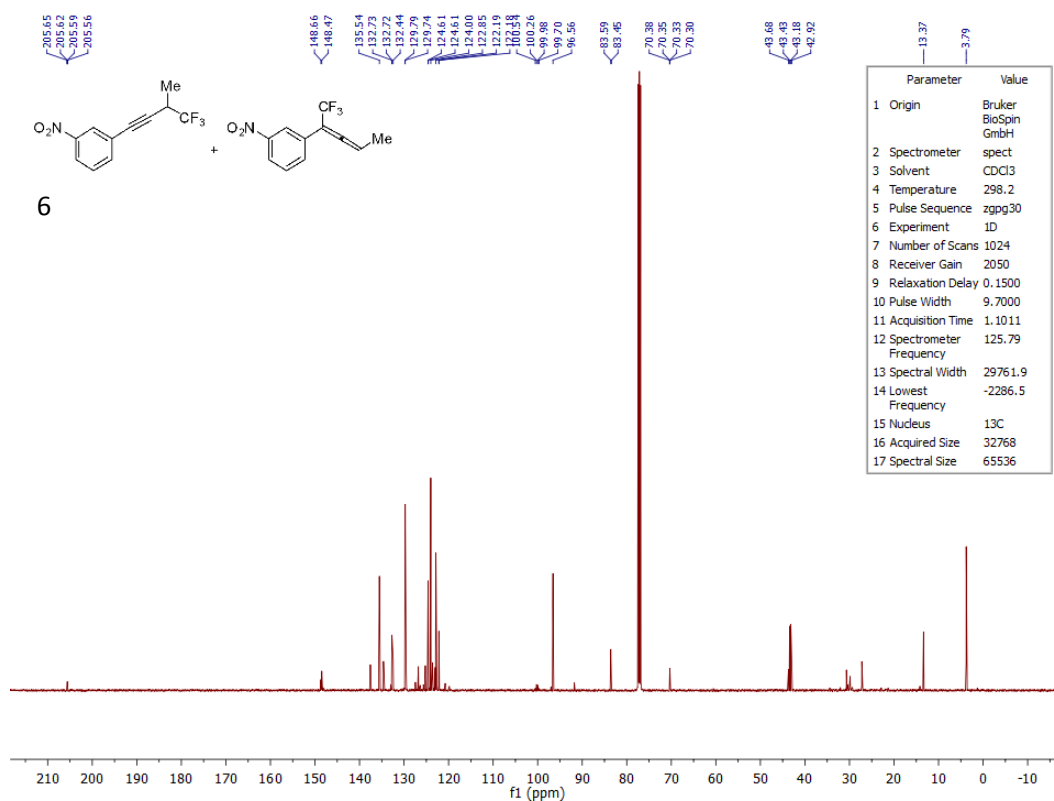



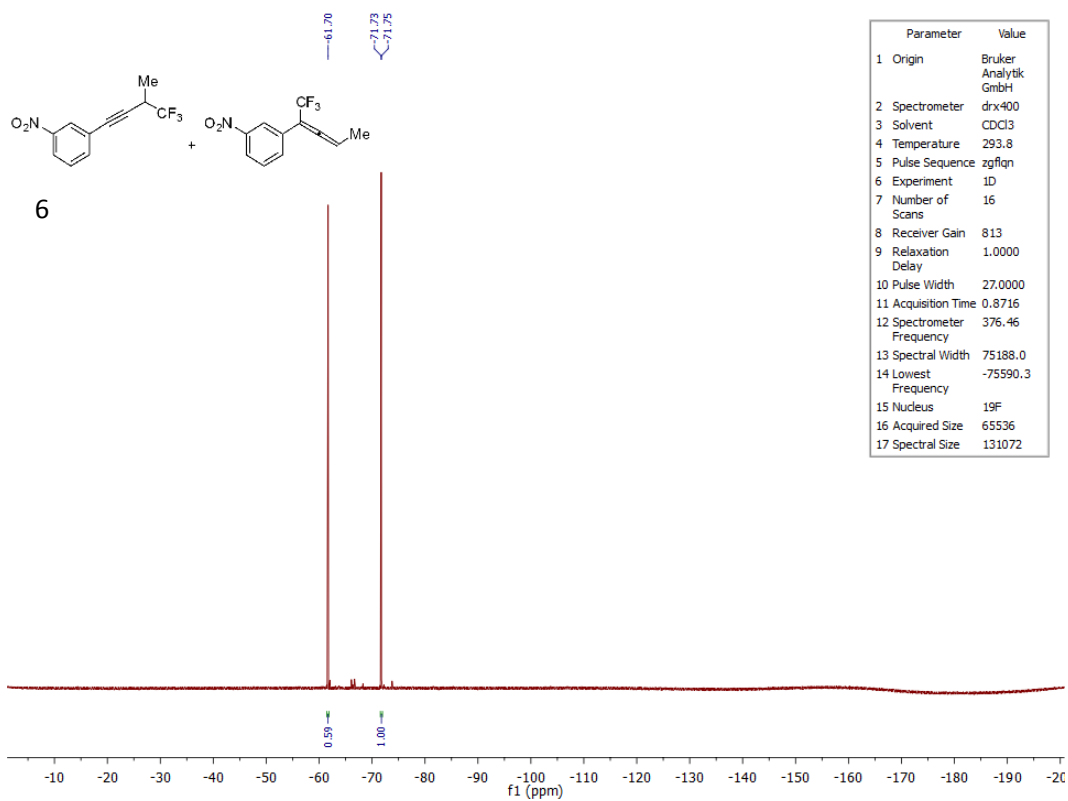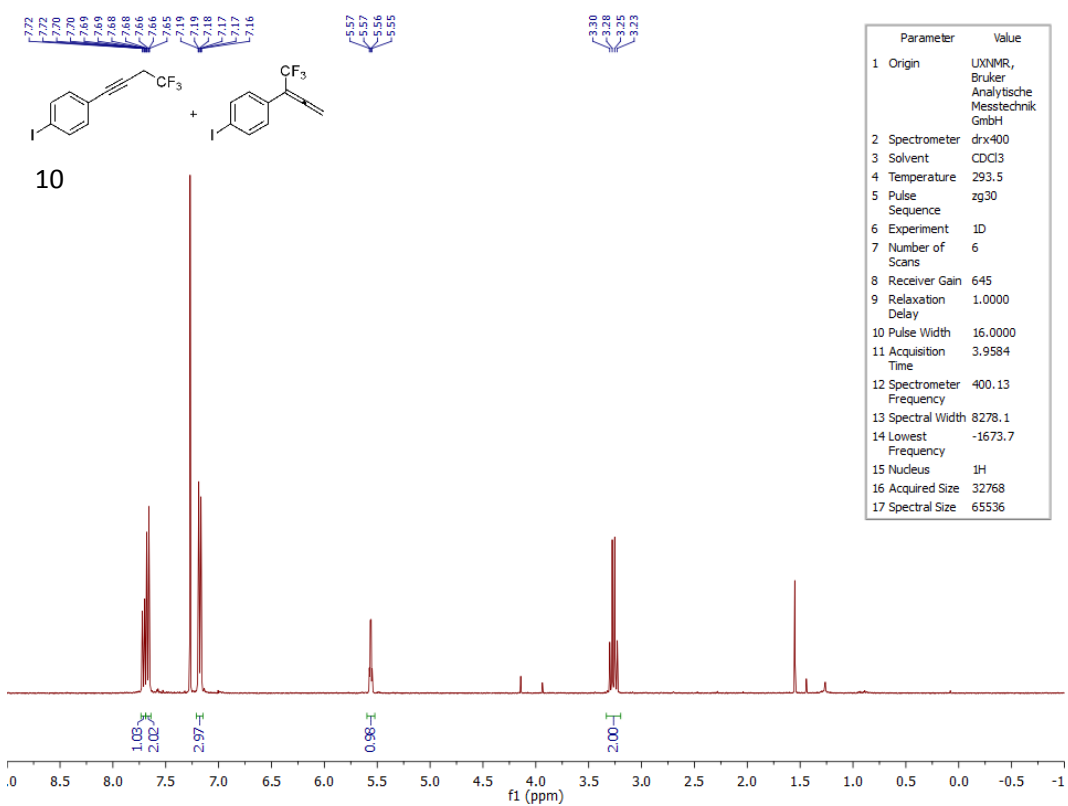

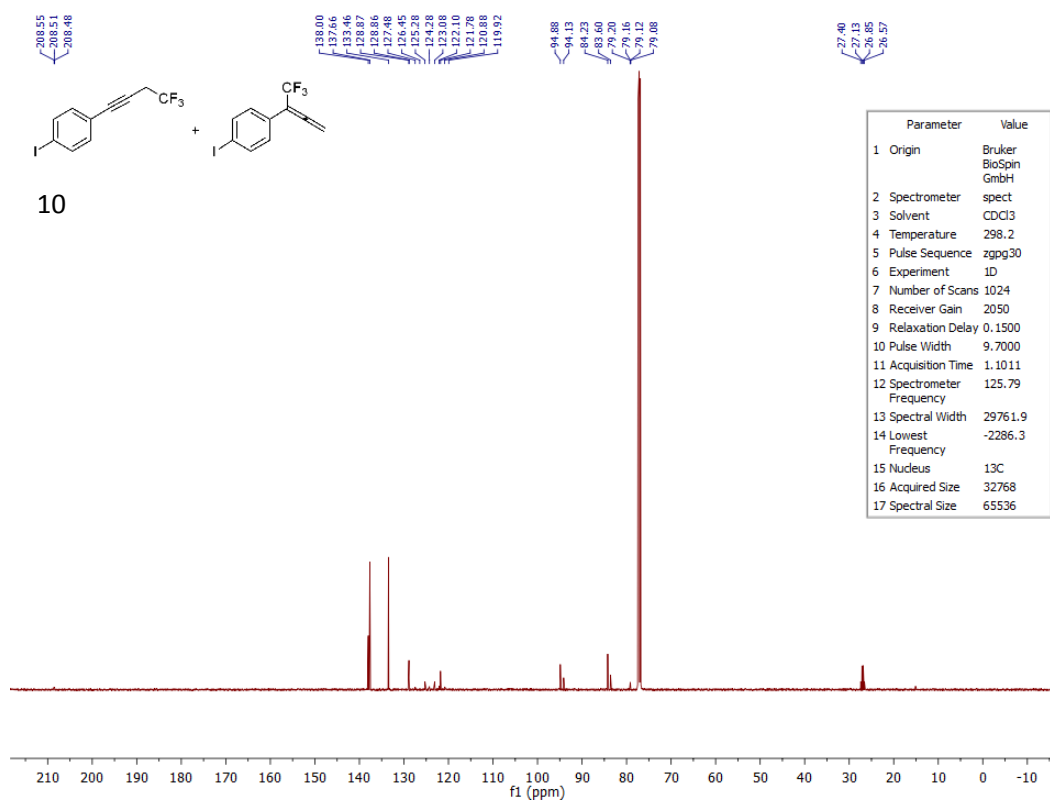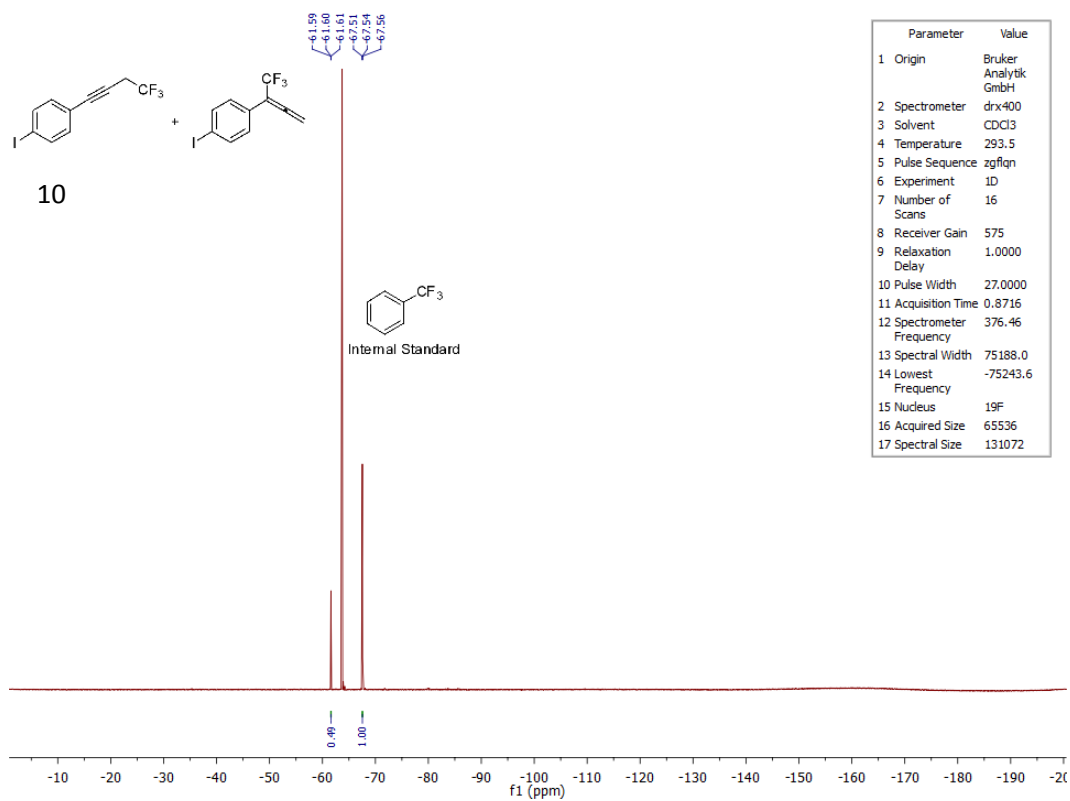

Supplement: NIHMS605443-supplement-NMR_Spectra.pdf [file NIHMS605443-supplement-NMR_Spectra.pdf]
